# Supplementary material for: Web-Based Genome-Wide Association Study Identifies Two Novel Loci and a Substantial Genetic Component for Parkinson's Disease
Source: PubMed Central journal article supplement (PMC3121750; doi:10.1371/journal.pgen.1002141), 2011-06-23
Supplement: pgen.1002141.s005.pdf [file pgen.1002141.s005.pdf]

# Web-based genome-wide association study identifies two novel loci and a substantial genetic component for Parkinson's disease

Do, Tung, Dorfman, Kiefer, Drabant, Francke, Mountain, Goldman, Tanner, Langston, Wojcicki, Eriksson

|            |              |              |             |
|------------|--------------|--------------|-------------|
| rs34637584 | GG (%)       | GA (%)       | AA (%)      |
| Control    | 29570 (89.8) | 53 (42.1)    | 1 (50.0)    |
| Case       | 3352 (10.2)  | 73 (57.9)    | 1 (50.0)    |
| i4000416   | TT (%)       | TC (%)       |             |
| Control    | 28399 (89.5) | 206 (66.9)   |             |
| Case       | 3319 (10.5)  | 102 (33.1)   |             |
| rs356220   | CC (%)       | CT (%)       | TT (%)      |
| Control    | 11792 (91.5) | 13789 (88.9) | 4014 (86.7) |
| Case       | 1094 (8.5)   | 1713 (11.1)  | 618 (13.3)  |
| rs12185268 | AA (%)       | AG (%)       | GG (%)      |
| Control    | 18074 (88.7) | 9786 (91.1)  | 1411 (92.3) |
| Case       | 2309 (11.3)  | 957 (8.9)    | 117 (7.7)   |
| rs10513789 | TT (%)       | TG (%)       | GG (%)      |
| Control    | 18770 (88.9) | 9572 (90.7)  | 1266 (92.7) |
| Case       | 2339 (11.1)  | 986 (9.3)    | 100 (7.3)   |
| rs6812193  | CC (%)       | CT (%)       | TT (%)      |
| Control    | 11797 (88.5) | 13762 (90.1) | 4062 (91.6) |
| Case       | 1535 (11.5)  | 1517 (9.9)   | 373 (8.4)   |
| rs6599389  | GG (%)       | GA (%)       | AA (%)      |
| Control    | 25412 (90.0) | 4017 (87.8)  | 152 (83.5)  |
| Case       | 2836 (10.0)  | 559 (12.2)   | 30 (16.5)   |
| rs11868035 | GG (%)       | GA (%)       | AA (%)      |
| Control    | 14038 (88.7) | 12626 (90.4) | 2921 (91.3) |
| Case       | 1795 (11.3)  | 1345 (9.6)   | 280 (8.7)   |
| rs823156   | AA (%)       | AG (%)       | GG (%)      |
| Control    | 19627 (89.0) | 8953 (90.8)  | 1037 (91.8) |
| Case       | 2424 (11.0)  | 908 (9.2)    | 93 (8.2)    |
| rs4130047  | TT (%)       | TC (%)       | CC (%)      |
| Control    | 14077 (90.2) | 12696 (89.5) | 2850 (87.3) |
| Case       | 1525 (9.8)   | 1485 (10.5)  | 416 (12.7)  |
| rs2823357  | GG (%)       | GA (%)       | AA (%)      |
| Control    | 11636 (90.3) | 13883 (89.6) | 4101 (87.8) |
| Case       | 1252 (9.7)   | 1604 (10.4)  | 570 (12.2)  |

**Table S1. Genotype by phenotype tables for SNPs in Table 2.**
