# Supplementary material for: Web-Based Genome-Wide Association Study Identifies Two Novel Loci and a Substantial Genetic Component for Parkinson's Disease
Source: PubMed Central journal article supplement (PMC3121750; doi:10.1371/journal.pgen.1002141), 2011-06-23
Supplement: pgen.1002141.s010.pdf [file pgen.1002141.s010.pdf]

# Web-based genome-wide association study identifies two novel loci and a substantial genetic component for Parkinson's disease

Do, Tung, Dorfman, Kiefer, Drabant, Francke, Mountain, Goldman, Tanner, Langston, Wojcicki, Eriksson

| rsid       | chrom | bp        | $w_i$    | $w_i^{missing}$ |
|------------|-------|-----------|----------|-----------------|
| bias       | -     | -         | -3.90034 | -               |
| rs6576808  | 1     | 86411336  | 0.19929  | 0.35684         |
| rs823156   | 1     | 204031263 | 0.17777  | 0.29033         |
| rs6680316  | 1     | 220023249 | -0.20185 | -0.37328        |
| rs2117511  | 2     | 136179131 | -0.19897 | -0.04754        |
| rs1234413  | 2     | 148560839 | 0.11041  | 0.12413         |
| rs9917256  | 2     | 168851281 | 0.17036  | 0.04290         |
| rs1020357  | 3     | 55318983  | 0.20863  | 0.03001         |
| rs4076437  | 3     | 130518659 | 0.16674  | 0.03897         |
| rs10513789 | 3     | 184242767 | -0.21099 | -0.08489        |
| rs6599389  | 4     | 9291113   | 0.22623  | 0.03386         |
| rs11248060 | 4     | 954359    | -0.17194 | -0.30041        |
| rs11724804 | 4     | 955779    | -0.07200 | -0.06244        |
| rs4395500  | 4     | 13433745  | -0.14916 | -0.23697        |
| rs4698412  | 4     | 15346446  | 0.11337  | 0.12498         |
| rs10517056 | 4     | 24494382  | -0.12298 | -0.07220        |
| rs7655536  | 4     | 77395792  | 0.09867  | 0.03925         |
| rs6812193  | 4     | 77418010  | 0.14010  | 0.17782         |
| rs356229   | 4     | 90825620  | 0.09754  | 0.07168         |
| rs11931074 | 4     | 90858538  | -0.16114 | -0.29658        |
| rs356220   | 4     | 90860363  | -0.05023 | -0.06279        |
| rs2736990  | 4     | 90897564  | -0.11748 | -0.12527        |
| rs4397141  | 5     | 29647646  | 0.22811  | 0.41922         |
| rs3869109  | 6     | 31292175  | 0.04131  | 0.03464         |
| rs9366778  | 6     | 31377152  | -0.07018 | -0.05655        |
| rs659445   | 6     | 31972283  | -0.08960 | -0.12489        |
| rs2072369  | 7     | 23112714  | 0.11663  | 0.14646         |
| rs6954831  | 7     | 36428666  | 0.21567  | 0.02441         |
| rs11971935 | 7     | 127209775 | 0.10319  | 0.08494         |
| rs732468   | 8     | 4285284   | 0.11018  | 0.06246         |
| rs11775723 | 8     | 4997737   | -0.14006 | -0.22884        |
| rs1486803  | 9     | 11706862  | -0.12592 | -0.09178        |
| rs3740304  | 10    | 313283    | 0.13577  | 0.19992         |
| rs17632029 | 10    | 14008131  | 0.17250  | 0.29483         |
| rs3844118  | 10    | 78840719  | -0.20969 | -0.03939        |
| rs10886515 | 10    | 121333579 | -0.14518 | -0.08396        |
| rs12360601 | 11    | 20008788  | 0.11898  | 0.17624         |
| rs6589497  | 11    | 115128203 | 0.19227  | 0.04309         |
| rs1503415  | 11    | 120991762 | 0.11567  | 0.15955         |
| rs10878246 | 12    | 38918366  | 0.09281  | 0.03528         |
| rs11564252 | 12    | 39100000  | 0.10261  | 0.03664         |
| rs278901   | 12    | 39688545  | 0.26682  | 0.02419         |
| rs764902   | 12    | 128874436 | -0.12846 | -0.09505        |
| rs10151526 | 14    | 33487738  | 0.28679  | 0.01368         |
| rs1885747  | 14    | 92117208  | -0.14963 | -0.24032        |
| rs2414739  | 15    | 59781426  | 0.13622  | 0.20016         |
| rs3812945  | 15    | 73076775  | 0.12188  | 0.10963         |
| rs11868035 | 17    | 17655826  | -0.15142 | -0.09347        |
| rs708382   | 17    | 39797870  | 0.11873  | 0.09308         |
| rs12185268 | 17    | 41279463  | 0.17404  | 0.27453         |
| rs12373139 | 17    | 41279910  | 0.06091  | 0.02609         |
| rs7225002  | 17    | 41544850  | 0.06612  | 0.08045         |
| rs415430   | 17    | 42214305  | -0.10118 | -0.04108        |
| rs12451779 | 17    | 55875936  | 0.23160  | 0.01986         |
| rs4130047  | 18    | 38932233  | 0.12908  | 0.08090         |
| rs3943675  | 18    | 66201794  | -0.11085 | -0.10047        |
| rs11878694 | 19    | 6947509   | 0.20332  | 0.35769         |
| rs1276377  | 20    | 55031299  | -0.06321 | -0.08472        |
| rs331617   | 20    | 55073255  | 0.10635  | 0.05984         |
| rs2823357  | 21    | 15836776  | 0.10946  | 0.08224         |
| rs138054   | 22    | 42550905  | 0.12893  | 0.05339         |

**Table S6. Bias-corrected  $E[FP] \leq 10$  model.** This model, which achieves a covariate-adjusted AUC of 0.614 on the NINDS data, was obtained by training on the 23andMe cohort, using the subset of SNPs that were shared with the NINDS cohort.  $w_i$  refers to the weight for each SNP (i.e., the log odds ratio per copy of the alphabetically lesser allele), and  $w_i^{missing}$  is the weight used in the algorithm in the case of missing data for that SNP.
