# Supplementary material for: Web-Based Genome-Wide Association Study Identifies Two Novel Loci and a Substantial Genetic Component for Parkinson's Disease
Source: PubMed Central journal article supplement (PMC3121750; doi:10.1371/journal.pgen.1002141), 2011-06-23
Supplement: pgen.1002141.s011.pdf [file pgen.1002141.s011.pdf]

# Web-based genome-wide association study identifies two novel loci and a substantial genetic component for Parkinson's disease

Do, Tung, Dorfman, Kiefer, Drabant, Francke, Mountain, Goldman, Tanner, Langston, Wojcicki, Eriksson

| SNP        | Low                    | High                   | Combined               | <i>p</i> -value |
|------------|------------------------|------------------------|------------------------|-----------------|
| rs34637584 | -1.153 (-1.79 - -0.52) | -2.100 (-2.50 - -1.70) | -2.263 (-2.66 - -1.86) | 0.859           |
| i4000416   | -1.441 (-1.89 - -0.99) | -1.162 (-1.46 - -0.87) | -1.398 (-1.67 - -1.12) | 0.875           |
| rs356220   | 0.220 (0.09 - 0.35)    | 0.244 (0.19 - 0.30)    | 0.251 (0.20 - 0.31)    | 0.652           |
| rs12185268 | -0.043 (-0.20 - 0.12)  | -0.297 (-0.37 - -0.22) | -0.263 (-0.33 - -0.19) | 0.002           |
| rs10513789 | 0.284 (0.11 - 0.46)    | 0.198 (0.12 - 0.27)    | 0.220 (0.15 - 0.29)    | 0.090           |
| rs6812193  | -0.037 (-0.17 - 0.10)  | -0.195 (-0.26 - -0.13) | -0.176 (-0.23 - -0.12) | 0.025           |
| rs6599389  | -0.286 (-0.50 - -0.07) | -0.252 (-0.35 - -0.15) | -0.271 (-0.36 - -0.18) | 0.193           |
| rs11868035 | 0.062 (-0.08 - 0.20)   | 0.175 (0.11 - 0.24)    | 0.162 (0.10 - 0.22)    | 0.013           |
| rs823156   | -0.180 (-0.35 - -0.01) | -0.183 (-0.26 - -0.11) | -0.190 (-0.26 - -0.12) | 0.937           |
| rs4130047  | -0.131 (-0.27 - 0.00)  | -0.145 (-0.20 - -0.08) | -0.149 (-0.21 - -0.09) | 0.257           |
| rs2823357  | -0.234 (-0.36 - -0.11) | -0.112 (-0.17 - -0.05) | -0.139 (-0.19 - -0.08) | 0.277           |

**Table S7. Test for heterogeneity.** The low confidence group consisted of participants who did not answer a questionnaire, whereas the high confidence group consisted of participants who did. The second and third columns show the estimated log odds-ratio for each SNP from Table 2 using only low and high confidence data, respectively. The fourth column shows the combined log odds-ratio when using data from both groups together, and the final column gives a *p*-value for heterogeneity. Note that while three of the *p*-values are nominally significant, only that for rs12185268 survives a correction for multiple testing (correcting for the 11 SNPs tested).
