# Supplementary material for: Web-Based Genome-Wide Association Study Identifies Two Novel Loci and a Substantial Genetic Component for Parkinson's Disease
Source: PLoS Genet. 2011 Jun 23;7(6):e1002141. doi: 10.1371/journal.pgen.1002141 (PMC3121750; doi:10.1371/journal.pgen.1002141)
Supplement: Table S2 — Details for all SNPs with -values under . See Table 2 for details. (XLS) [file pgen.1002141.s006.xls]

## Sheet: Sheet1
SNP	Chromosome	Position	Region	Alleles	MAF	HWE	Call	OR	p-value
rs34637584	12	39020469	LRRK2	G/A	0.002	0.0072	1	9.615 (6.43 - 14.37)	1.82e-28
i4000416	1	153472258	GBA	T/C	0.005	1	0.969	4.048 (3.08 - 5.32)	5.17e-21
rs356219	4	90856624	GPRIN3 SNCA	A/G	0.372	0.13	0.95	1.304 (1.23 - 1.38)	7.91e-21
rs356221	4	90861487	SNCA	T/A	0.469	0.7	0.964	1.288 (1.22 - 1.36)	4.55e-20
rs356203	4	90885064	SNCA	T/C	0.375	0.91	0.97	1.287 (1.22 - 1.36)	2.06e-19
rs356200	4	90887637	SNCA	C/T	0.467	0.98	0.969	1.280 (1.21 - 1.35)	2.25e-19
rs356220	4	90860363	SNCA	C/T	0.375	0.79	0.999	1.285 (1.22 - 1.36)	2.29e-19
rs356168	4	90893454	SNCA	A/G	0.467	0.97	0.97	1.280 (1.21 - 1.35)	2.32e-19
rs356165	4	90865909	SNCA	A/G	0.376	0.82	0.961	1.287 (1.22 - 1.36)	2.62e-19
rs2736990	4	90897564	SNCA	A/G	0.467	0.96	1	1.275 (1.21 - 1.35)	6.11e-19
rs2737029	4	90930793	SNCA	T/C	0.404	0.1	0.97	1.252 (1.19 - 1.32)	2.8e-16
rs1876828	17	41267306	MAPT	C/T	0.217	9.8e-05	0.977	0.764 (0.71 - 0.82)	1.14e-14
rs2316765	17	41268235	MAPT	T/C	0.215	0.58	0.998	0.770 (0.72 - 0.82)	2.59e-14
rs12185268	17	41279463	MAPT	A/G	0.211	0.02	0.988	0.769 (0.72 - 0.82)	2.72e-14
rs12373139	17	41279910	MAPT	G/A	0.214	0.53	0.998	0.770 (0.72 - 0.82)	3.08e-14
rs1918798	17	41578112	MAPT	G/A	0.215	0.37	0.967	0.770 (0.72 - 0.83)	3.54e-14
rs4525537	17	41268504	MAPT	T/C	0.214	0.4	0.998	0.772 (0.72 - 0.83)	4.62e-14
rs17563986	17	41347100	MAPT	A/G	0.215	0.5	1	0.772 (0.72 - 0.83)	4.85e-14
rs767057	17	41354650	MAPT	A/G	0.215	0.53	1	0.773 (0.72 - 0.83)	5.02e-14
rs1981997	17	41412603	MAPT	G/A	0.215	0.48	1	0.773 (0.72 - 0.83)	5.69e-14
rs1800547	17	41407682	MAPT	A/G	0.215	0.45	0.999	0.773 (0.72 - 0.83)	5.72e-14
rs17564983	17	41367654	MAPT	A/C	0.215	0.49	0.999	0.773 (0.72 - 0.83)	5.91e-14
rs16940676	17	41266817	MAPT	G/A	0.215	0.54	0.998	0.773 (0.72 - 0.83)	6.4e-14
rs1876830	17	41267133	MAPT	C/T	0.215	0.52	0.994	0.773 (0.72 - 0.83)	6.57e-14
rs1864325	17	41333623	MAPT	C/T	0.215	0.7	1	0.774 (0.72 - 0.83)	7.13e-14
rs4482334	17	41268611	MAPT	T/C	0.215	0.34	0.999	0.774 (0.72 - 0.83)	7.26e-14
rs8070723	17	41436901	MAPT	A/G	0.216	0.44	1	0.774 (0.72 - 0.83)	7.65e-14
rs2532269	17	41605885	MAPT	T/C	0.215	0.33	0.994	0.774 (0.72 - 0.83)	8.76e-14
rs393152	17	41074926	MAPT	A/G	0.216	0.53	1	0.775 (0.72 - 0.83)	9.22e-14
rs878887	17	41268363	MAPT	C/T	0.214	0.39	0.969	0.774 (0.72 - 0.83)	9.65e-14
rs878888	17	41268416	MAPT	A/G	0.214	0.76	0.998	0.775 (0.72 - 0.83)	1.01e-13
rs16940665	17	41263677	MAPT	T/C	0.214	0.24	0.966	0.774 (0.72 - 0.83)	1.05e-13
rs17425752	17	41262507	MAPT	A/C	0.211	0.011	0.988	0.775 (0.72 - 0.83)	1.22e-13
rs2668692	17	41648797	MAPT	G/A	0.216	0.82	0.998	0.776 (0.72 - 0.83)	1.27e-13
rs16940674	17	41266288	MAPT	C/T	0.213	1	0.998	0.775 (0.72 - 0.83)	1.62e-13
rs415430	17	42214305	MAPT	T/C	0.203	0.45	1	0.773 (0.72 - 0.83)	1.71e-13
rs199533	17	42184098	MAPT	G/A	0.199	0.57	0.999	0.771 (0.72 - 0.83)	1.9e-13
rs2532274	17	41602941	MAPT	A/G	0.22	0.033	0.99	0.781 (0.73 - 0.84)	3.63e-13
rs1876829	17	41267224	MAPT	T/C	0.214	0.19	0.991	0.779 (0.73 - 0.83)	3.9e-13
rs356229	4	90825620	GPRIN3 SNCA	T/C	0.367	0.62	1	1.224 (1.16 - 1.29)	4.84e-13
rs16940668	17	41263747	MAPT	G/A	0.213	0.00032	0.951	0.776 (0.72 - 0.83)	5.12e-13
rs169201	17	42145386	MAPT	A/G	0.199	0.58	0.999	0.775 (0.72 - 0.83)	5.6e-13
rs1991556	17	41439239	MAPT	G/A	0.215	0.4	0.998	0.782 (0.73 - 0.84)	6.18e-13
rs28903073	12	38939777	LRRK2	G/A	0.005	0.014	1	2.764 (2.11 - 3.62)	2.72e-12
rs1635291	17	41107696	MAPT	A/G	0.239	0.9	1	0.798 (0.75 - 0.85)	5.96e-12
rs7215239	17	41123556	MAPT	T/C	0.237	0.68	0.998	0.800 (0.75 - 0.85)	1.42e-11
rs11931074	4	90858538	GPRIN3 SNCA	G/T	0.08	0.13	1	1.372 (1.25 - 1.50)	2.06e-11
rs3857059	4	90894261	SNCA	A/G	0.08	0.12	1	1.366 (1.25 - 1.50)	4.12e-11
rs3857053	4	90864697	SNCA	C/T	0.08	0.11	0.97	1.365 (1.25 - 1.49)	5.15e-11
rs3822086	4	90883817	SNCA	C/T	0.08	0.08	0.97	1.364 (1.25 - 1.49)	5.18e-11
rs3775423	4	90876514	SNCA	C/T	0.081	0.21	0.959	1.364 (1.25 - 1.49)	6.23e-11
rs417968	17	41084159	MAPT	A/G	0.252	0.91	1	0.811 (0.76 - 0.86)	7.74e-11
rs11012	17	40869224	PLEKHM1	C/T	0.18	0.97	0.997	0.786 (0.73 - 0.85)	7.74e-11
rs10513789	3	184242767	MCCC1	T/G	0.201	0.32	0.999	0.803 (0.75 - 0.86)	2.67e-10
rs2572323	4	90853575	GPRIN3 SNCA	G/A	0.304	0.94	0.969	1.200 (1.13 - 1.27)	3.99e-10
rs181489	4	90854043	GPRIN3 SNCA	C/T	0.303	0.95	0.968	1.200 (1.13 - 1.27)	4.28e-10
rs6812193	4	77418010	FAM47E	C/T	0.365	0.59	1	0.839 (0.79 - 0.89)	7.55e-10
rs17690703	17	41281077	MAPT	C/T	0.251	0.18	1	0.822 (0.77 - 0.88)	8.05e-10
rs2074404	17	42220599	MAPT	T/G	0.255	0.1	1	0.823 (0.77 - 0.88)	9.43e-10
rs10516845	4	90903301	SNCA	A/G	0.069	0.056	0.969	1.358 (1.23 - 1.49)	1.16e-09
rs7225002	17	41544850	MAPT	A/G	0.392	0.82	0.999	0.845 (0.80 - 0.89)	2.21e-09
rs7684318	4	90874026	SNCA	T/C	0.07	0.0018	0.969	1.345 (1.22 - 1.48)	2.55e-09
rs3775439	4	90928764	SNCA	G/A	0.126	0.38	1	1.254 (1.16 - 1.35)	7.66e-09
rs183211	17	42143493	MAPT	G/A	0.233	0.89	1	0.827 (0.77 - 0.88)	9.38e-09
rs7640612	3	184225961	MCCC1	A/C	0.302	0.18	0.999	0.843 (0.79 - 0.89)	1.21e-08
rs356169	4	90851791	GPRIN3 SNCA	T/G	0.335	0.11	0.961	1.178 (1.11 - 1.25)	1.49e-08
rs168552	4	90862167	SNCA	T/C	0.294	0.25	0.994	1.180 (1.11 - 1.25)	1.73e-08
rs356174	4	90849924	GPRIN3 SNCA	T/G	0.336	0.59	1	1.170 (1.11 - 1.24)	3.79e-08
rs6599389	4	929113	TMEM175	G/A	0.075	0.87	0.999	1.311 (1.19 - 1.44)	3.87e-08
rs894278	4	90953558	SNCA	T/G	0.059	0.62	0.989	1.350 (1.22 - 1.50)	4.24e-08
rs1372520	4	90976528	SNCA	C/T	0.223	0.2	0.969	0.833 (0.78 - 0.89)	5.1e-08
rs11868035	17	17655826	SMCR5 SREBF1	G/A	0.309	0.14	0.999	0.851 (0.80 - 0.90)	5.61e-08
rs10516839	4	90727363	GPRIN3 SNCA	T/G	0.241	0.46	1	1.184 (1.11 - 1.26)	6.05e-08
rs1372519	4	90976332	SNCA	G/A	0.223	0.23	0.969	0.834 (0.78 - 0.89)	6.31e-08
rs12638619	3	184281936	MCCC1	C/T	0.141	0.47	1	0.806 (0.74 - 0.87)	9.83e-08
rs823156	1	204031263	SLC41A1	A/G	0.183	0.5	1	0.827 (0.77 - 0.89)	1.27e-07
rs2298728	4	90961838	SNCA	G/A	0.06	0.58	0.969	1.331 (1.20 - 1.48)	1.49e-07
rs9822789	3	184285568	MCCC1	G/T	0.138	0.023	0.992	0.809 (0.75 - 0.88)	1.72e-07
rs7224296	17	42155230	MAPT	A/G	0.277	0.35	1	0.851 (0.80 - 0.90)	1.89e-07
rs708730	1	204044403	SLC41A1	A/G	0.182	0.31	1	0.829 (0.77 - 0.89)	2.1e-07
rs11724804	4	955779	DGKQ	G/A	0.434	0.59	0.999	0.867 (0.82 - 0.92)	2.43e-07
rs4130047	18	38932233	RIT2	T/C	0.313	0.6	1	1.161 (1.10 - 1.23)	2.44e-07
rs7655536	4	77395792	FAM47E	T/C	0.199	0.023	1	1.186 (1.11 - 1.26)	3.04e-07
rs9841498	3	184209791	DCUN1D1 MCCC1	C/T	0.279	0.13	1	0.856 (0.81 - 0.91)	3.78e-07
rs3772715	3	184332258	LAMP3	T/C	0.202	0.23	0.999	0.840 (0.78 - 0.90)	4.65e-07
rs482912	3	184336364	LAMP3	C/T	0.259	0.82	0.999	0.854 (0.80 - 0.91)	5.17e-07
rs2197120	4	90948625	SNCA	G/A	0.213	0.31	1	0.843 (0.79 - 0.90)	5.45e-07
rs2823357	21	15836776	CYCSP42 USP25	G/A	0.376	0.87	1	1.149 (1.09 - 1.21)	6.32e-07
rs12938476	17	41168668	MAPT	T/C	0.409	0.81	1	0.871 (0.82 - 0.92)	6.57e-07
rs4792891	17	41329294	MAPT	T/G	0.333	0.55	1	0.865 (0.82 - 0.92)	6.63e-07
rs4925114	17	17651995	SMCR5 RAI1	G/A	0.372	0.092	0.999	0.869 (0.82 - 0.92)	6.75e-07
rs7666265	4	77395305	FAM47E	G/A	0.196	0.093	0.999	1.180 (1.11 - 1.26)	7.49e-07
rs356180	4	90847150	GPRIN3 SNCA	G/A	0.306	0.98	0.97	1.155 (1.09 - 1.22)	7.65e-07
rs2179030	21	15837982	CYCSP42 USP25	C/T	0.376	0.88	1	1.147 (1.09 - 1.21)	8.91e-07
rs9878775	3	184142647	ATP11B DCUN1D1	C/T	0.246	0.097	1	0.853 (0.80 - 0.91)	1e-06
rs9902941	17	17674485	MIR33B SREBF1	T/C	0.375	0.61	1	0.870 (0.82 - 0.92)	1.07e-06
rs9814216	3	184153852	DCUN1D1	T/C	0.247	0.081	0.999	0.854 (0.80 - 0.91)	1.07e-06
rs278901	12	39688545	CNTN1	G/A	0.045	0.57	1	1.351 (1.20 - 1.52)	1.17e-06
rs356191	4	90907143	SNCA	G/A	0.213	0.38	0.999	0.846 (0.79 - 0.91)	1.25e-06
rs356199	4	90901350	SNCA	A/G	0.279	0.41	0.97	1.153 (1.09 - 1.22)	1.34e-06
rs11649804	17	17637480	SMCR5 RAI1	C/A	0.305	8.8e-05	0.986	0.866 (0.82 - 0.92)	1.52e-06
rs9882050	3	184282733	MCCC1	C/T	0.169	0.41	1	0.834 (0.77 - 0.90)	1.54e-06
rs4925119	17	17683629	MIR33B TOM1L2	G/A	0.374	0.53	0.998	0.872 (0.82 - 0.92)	1.55e-06
rs278909	12	39710339	CNTN1	T/C	0.049	0.13	1	1.321 (1.18 - 1.48)	1.63e-06
rs242941	17	41248300	MAPT	C/A	0.313	0.022	0.993	1.146 (1.08 - 1.21)	1.69e-06
rs10999435	10	72045807	PRF1 ADAMTS14	G/A	0.07	0.24	1	1.271 (1.15 - 1.40)	1.81e-06
rs11248060	4	954359	DGKQ	C/T	0.126	0.055	1	1.202 (1.11 - 1.30)	1.91e-06
rs11716740	3	184314382	MCCC1 LAMP3	C/T	0.138	0.5	1	0.821 (0.76 - 0.89)	1.93e-06
rs356163	4	90915850	SNCA	C/A	0.278	0.33	0.969	1.150 (1.08 - 1.22)	2.08e-06
rs823114	1	203986155	NUCKS1 RAB7L1	A/G	0.443	0.0041	0.995	0.879 (0.83 - 0.93)	2.12e-06
rs660895	6	32685358	HLA-DRB1 HLA-DQA1	A/G	0.191	0.97	0.999	0.845 (0.79 - 0.91)	2.13e-06
rs356188	4	90910560	SNCA	T/C	0.212	0.83	0.999	0.850 (0.79 - 0.91)	2.13e-06
rs356187	4	90911491	SNCA	C/T	0.278	0.37	0.97	1.150 (1.08 - 1.22)	2.16e-06
rs2245801	4	90976863	SNCA	C/T	0.21	0.21	0.97	0.849 (0.79 - 0.91)	2.18e-06
rs2583978	4	90969349	SNCA	C/A	0.215	0.23	1	0.851 (0.80 - 0.91)	2.39e-06
rs7451962	6	32690413	HLA-DRB1 HLA-DQA1	G/A	0.439	0.82	0.976	1.140 (1.08 - 1.20)	2.49e-06
rs1564282	4	842313	GAK	C/T	0.112	0.18	0.999	1.212 (1.12 - 1.31)	2.56e-06
rs9379968	6	27352569	HFE	G/A	0.471	0.45	1	1.136 (1.08 - 1.20)	2.59e-06
rs8067056	17	41439785	MAPT	T/C	0.378	0.65	0.968	0.876 (0.83 - 0.93)	2.69e-06
rs6589497	11	115128203	FTLP7 LOC283143	T/C	0.112	0.39	0.999	1.211 (1.12 - 1.31)	2.69e-06
rs10878246	12	38918366	LRRK2	T/G	0.19	0.0031	0.994	1.170 (1.10 - 1.25)	2.79e-06
rs4397141	5	29647646	LOC100130803 PGBD3P2	C/T	0.081	0.35	0.958	0.772 (0.69 - 0.86)	3.02e-06
rs1441904	4	77370904	SCARB2 FAM47E	A/G	0.292	0.21	1	1.147 (1.08 - 1.21)	3.2e-06
rs2894181	6	31282506	HCG27 HLA-C	A/G	0.482	0.41	1	0.881 (0.83 - 0.93)	3.32e-06
rs2395163	6	32495787	BTNL2 HLA-DRA	T/C	0.209	0.29	1	0.853 (0.80 - 0.91)	3.4e-06
rs2837740	21	40889386	DSCAM	C/T	0.301	0.073	1	0.870 (0.82 - 0.92)	3.62e-06
rs7080373	10	72026772	KIAA1274 PRF1	C/T	0.061	0.025	0.975	1.283 (1.15 - 1.43)	3.66e-06
rs2737033	4	90926970	SNCA	T/C	0.278	0.4	0.969	1.146 (1.08 - 1.22)	3.69e-06
rs9917256	2	168851281	PHF5GP LASS6	G/A	0.126	0.9	0.999	1.199 (1.11 - 1.30)	3.72e-06
rs11726508	4	878937	GAK	C/T	0.151	0.83	1	1.184 (1.10 - 1.27)	3.86e-06
rs964051	4	77418438	FAM47E	C/A	0.418	0.17	1	1.134 (1.07 - 1.20)	4.24e-06
rs1502762	3	184246274	MCCC1	A/G	0.216	0.55	1	0.856 (0.80 - 0.91)	4.39e-06
rs3763309	6	32483951	BTNL2 HLA-DRA	C/A	0.212	0.22	0.999	0.855 (0.80 - 0.91)	4.7e-06
rs10103652	8	139078865	FLJ45872	A/C	0.389	0.38	0.995	0.879 (0.83 - 0.93)	5.08e-06
rs3183702	17	17688014	TOM1L2	G/A	0.374	0.78	1	0.878 (0.83 - 0.93)	5.48e-06
rs11878694	19	6947509	EMR4P FLJ25758	A/G	0.12	0.18	1	0.818 (0.75 - 0.89)	5.59e-06
rs3763312	6	32484326	BTNL2 HLA-DRA	G/A	0.212	0.32	0.998	0.856 (0.80 - 0.92)	5.62e-06
rs10886515	10	121333579	TIAL1	T/C	0.289	0.68	1	0.870 (0.82 - 0.92)	5.86e-06
rs1882642	2	141578380	LRP1B	G/A	0.141	0.53	0.979	1.188 (1.10 - 1.28)	6.27e-06
rs356186	4	90924387	SNCA	G/A	0.201	0.094	0.969	0.854 (0.80 - 0.91)	6.42e-06
rs12758898	1	215538618	ESRRG GPATCH2	C/T	0.249	0.24	0.999	0.865 (0.81 - 0.92)	6.52e-06
rs35883	3	29572795	LOC100129900 RBMS3	G/A	0.456	0.42	0.999	1.130 (1.07 - 1.19)	6.67e-06
rs659445	6	31972283	EHMT2	A/G	0.303	0.00013	1	1.141 (1.08 - 1.21)	7.2e-06
rs3869109	6	31292175	HCG27 HLA-C	G/A	0.419	0.32	1	1.130 (1.07 - 1.19)	7.33e-06
rs3818717	17	17647830	SMCR5 RAI1	C/T	0.434	0.056	0.969	0.885 (0.84 - 0.93)	7.4e-06
rs7970326	12	38894158	SLC2A13 LRRK2	A/C	0.326	0.00064	0.986	0.877 (0.83 - 0.93)	7.47e-06
rs4074110	3	184211363	DCUN1D1 MCCC1	G/A	0.295	0.15	1	0.873 (0.82 - 0.93)	7.58e-06
rs3733250	4	77411892	FAM47E	G/A	0.419	0.099	1	1.130 (1.07 - 1.19)	7.85e-06
rs4954880	2	141562816	LRP1B	C/T	0.106	0.79	0.97	1.207 (1.11 - 1.31)	8.05e-06
rs11097313	4	77404317	FAM47E	G/A	0.419	0.055	1	1.129 (1.07 - 1.19)	8.18e-06
rs10878244	12	38917875	LRRK2	G/A	0.185	0.13	0.969	1.164 (1.09 - 1.24)	8.24e-06
rs535586	6	31968316	EHMT2	C/T	0.303	9.2e-05	0.984	1.141 (1.08 - 1.21)	8.54e-06
rs2380922	2	141526714	LRP1B	C/T	0.084	0.43	0.998	1.229 (1.12 - 1.35)	8.56e-06
rs13328933	12	39640016	CNTN1	C/T	0.072	0.48	1	1.250 (1.13 - 1.38)	8.58e-06
rs1471738	3	102398652	ACTR3P3 IMPG2	A/G	0.478	0.29	0.999	0.886 (0.84 - 0.93)	8.6e-06
rs3957148	6	32790115	HLA-DQB1 HLA-DQA2	A/G	0.104	0.98	0.999	0.812 (0.74 - 0.89)	8.83e-06
rs11097338	4	77508976	LOC100131940 CCDC158	G/A	0.355	0.56	0.999	0.880 (0.83 - 0.93)	9.03e-06
rs1491932	12	38888491	SLC2A13 LRRK2	G/T	0.329	0.19	0.997	0.878 (0.83 - 0.93)	9.12e-06
rs4925138	17	17933518	DRG2	G/T	0.418	0.088	1	0.884 (0.84 - 0.93)	9.22e-06
rs2414739	15	59781426	VPS13C	A/G	0.265	0.18	1	0.869 (0.82 - 0.93)	9.46e-06
rs3998159	6	32789997	HLA-DQB1 HLA-DQA2	A/C	0.104	0.59	1	0.813 (0.74 - 0.89)	1.06e-05
rs1866995	4	90950732	SNCA	A/G	0.04	0.28	0.999	1.323 (1.17 - 1.50)	1.06e-05
rs9275184	6	32762692	HLA-DQB1 HLA-DQA2	T/C	0.103	0.41	0.97	0.812 (0.74 - 0.89)	1.09e-05
rs7771953	6	27379322	HFE	G/A	0.43	0.32	1	1.127 (1.07 - 1.19)	1.19e-05
rs1568069	2	236283381	AGAP1	G/T	0.334	0.23	0.999	1.132 (1.07 - 1.20)	1.24e-05
rs2139950	3	116353817	LOC100128175 LOC645207	G/A	0.119	0.34	0.969	0.828 (0.76 - 0.90)	1.3e-05
rs3775424	4	90884279	SNCA	C/T	0.03	0.024	0.959	1.365 (1.18 - 1.58)	1.33e-05
rs2638230	12	38890342	SLC2A13 LRRK2	G/T	0.327	0.59	0.965	0.881 (0.83 - 0.93)	1.34e-05
rs7251424	19	2272430	LOC100129831 LSM7	T/C	0.254	0.13	1	1.142 (1.08 - 1.21)	1.36e-05
rs7803999	7	48427272	ABCA13	T/C	0.092	0.6	1	1.215 (1.11 - 1.33)	1.37e-05
rs854813	17	17944570	DRG2	T/C	0.418	0.084	0.999	0.886 (0.84 - 0.94)	1.38e-05
rs1441910	4	77412473	FAM47E	T/C	0.417	0.22	0.996	1.126 (1.07 - 1.19)	1.45e-05
rs7211714	17	17927680	C17orf39 DRG2	A/G	0.332	0.43	1	0.880 (0.83 - 0.93)	1.5e-05
rs2072369	7	23112714	KLHL7	A/G	0.372	0.36	1	0.884 (0.84 - 0.94)	1.51e-05
rs1491941	12	38907082	LRRK2	A/G	0.327	0.48	0.969	0.882 (0.83 - 0.93)	1.53e-05
rs13078931	3	184261635	MCCC1	A/G	0.243	0.44	0.998	0.869 (0.82 - 0.93)	1.54e-05
rs12694823	2	230660290	SLC16A14 SP110	A/G	0.196	0.46	0.975	1.159 (1.08 - 1.24)	1.55e-05
rs10519001	15	57245504	MYO1E	T/G	0.392	0.31	1	0.886 (0.84 - 0.94)	1.55e-05
rs750965	11	134140452	LOC729305	C/T	0.049	0.096	0.999	1.288 (1.15 - 1.45)	1.57e-05
rs331617	20	55073255	PTMAP6 BMP7	T/C	0.281	0.45	1	1.135 (1.07 - 1.20)	1.61e-05
rs1880753	17	41167031	MAPT	A/G	0.455	0.68	1	0.889 (0.84 - 0.94)	1.63e-05
rs13323338	3	29595608	LOC100129900 RBMS3	T/C	0.348	0.075	1	1.129 (1.07 - 1.19)	1.64e-05
rs7501812	17	17691632	TOM1L2	A/G	0.38	0.24	0.994	0.886 (0.84 - 0.94)	1.72e-05
rs4395500	4	13433745	RPL32P12 LOC391636	C/T	0.206	0.13	1	1.149 (1.08 - 1.22)	1.73e-05
rs10022284	4	77552054	LOC100131940 SHROOM3	T/C	0.354	0.33	0.992	0.885 (0.84 - 0.94)	1.77e-05
rs1486803	9	11706862	LOC646114 LOC100049717	T/C	0.364	0.0061	0.985	0.884 (0.84 - 0.94)	1.87e-05
rs6475667	9	22598036	DMRTA1 LOC646609	A/G	0.138	0.76	1	0.838 (0.77 - 0.91)	1.9e-05
rs13438188	7	23110722	FAM126A KLHL7	T/C	0.372	0.44	1	0.886 (0.84 - 0.94)	1.95e-05
rs2583961	4	90998781	SNCA	G/A	0.243	0.6	0.951	0.867 (0.81 - 0.93)	1.97e-05
rs1525583	2	141535892	LRP1B	A/G	0.116	0.65	1	1.191 (1.10 - 1.29)	1.99e-05
rs4890426	18	38926416	RIT2	T/G	0.172	0.025	0.986	1.159 (1.08 - 1.24)	1.99e-05
rs3905495	6	31373518	HLA-C HLA-B	G/A	0.345	0.97	1	0.883 (0.83 - 0.94)	2.01e-05
rs4683877	3	102403970	ACTR3P3 IMPG2	G/A	0.249	0.25	1	0.872 (0.82 - 0.93)	2.02e-05
rs6967419	7	23102835	FAM126A KLHL7	C/T	0.372	0.4	0.97	0.887 (0.84 - 0.94)	2.02e-05
rs7778020	7	48427057	ABCA13	G/A	0.092	0.92	1	1.211 (1.11 - 1.32)	2.02e-05
rs10992619	9	94863568	SUSD3	T/C	0.078	0.94	1	1.226 (1.12 - 1.35)	2.05e-05
rs3792424	3	3092700	IL5RA	A/G	0.079	0.57	1	1.226 (1.12 - 1.35)	2.12e-05
rs11946079	4	77324724	SCARB2	T/G	0.214	0.14	1	1.146 (1.08 - 1.22)	2.16e-05
rs2737026	4	90998846	SNCA	G/A	0.241	0.78	0.965	0.868 (0.81 - 0.93)	2.17e-05
rs2140872	2	141558330	LRP1B	C/T	0.116	0.55	1	1.190 (1.10 - 1.29)	2.18e-05
rs10465173	9	80954795	KRT18P24 CHCHD9	C/A	0.013	0.14	1	1.571 (1.27 - 1.94)	2.22e-05
rs946785	10	7041660	LOC439949 SFMBT2	A/G	0.461	0.59	0.999	0.891 (0.84 - 0.94)	2.26e-05
rs9461362	6	27411906	HFE	C/T	0.161	0.71	1	1.166 (1.09 - 1.25)	2.26e-05
rs8012152	14	54495317	WDHD1	T/C	0.324	0.74	1	0.883 (0.83 - 0.94)	2.33e-05
rs34255679	16	6107295	RBFOX1	D/I	0.013	0.0077	0.953	1.528 (1.24 - 1.88)	2.35e-05
rs6735555	2	230729308	SLC16A14 SP110	A/C	0.232	0.00088	0.997	1.141 (1.07 - 1.21)	2.37e-05
rs6502622	17	17775416	TOM1L2	A/G	0.394	0.76	1	0.888 (0.84 - 0.94)	2.39e-05
rs9303521	17	41160977	MAPT	G/T	0.467	0.54	1	0.891 (0.84 - 0.94)	2.41e-05
rs4698412	4	15346446	RPL10AP7 CD38	A/G	0.449	0.062	0.999	0.891 (0.84 - 0.94)	2.41e-05
rs3796661	4	90906530	SNCA	C/T	0.03	0.013	1	1.362 (1.18 - 1.57)	2.43e-05
rs1688609	6	119141834	PLN ASF1A	G/T	0.324	0.81	1	0.883 (0.83 - 0.94)	2.45e-05
rs947211	1	204019288	RAB7L1 SLC41A1	G/A	0.245	0.028	1	0.874 (0.82 - 0.93)	2.55e-05
rs2736994	4	91003551	LOC644248 MMRN1	G/A	0.213	0.58	1	0.865 (0.81 - 0.93)	2.56e-05
rs854791	17	17970582	MYO15A	C/T	0.327	0.89	0.999	0.883 (0.83 - 0.94)	2.57e-05
rs7222480	17	17759542	TOM1L2	G/T	0.396	0.89	0.996	0.888 (0.84 - 0.94)	2.64e-05
rs7521	17	41461242	MAPT	G/A	0.461	0.87	1	1.121 (1.06 - 1.18)	2.66e-05
rs11065598	12	120418046	KDM2B	C/T	0.092	0.11	0.999	1.205 (1.10 - 1.31)	2.66e-05
rs987257	7	23114365	KLHL7	G/A	0.37	0.43	1	0.888 (0.84 - 0.94)	2.69e-05
rs15775	7	23131226	KLHL7	C/T	0.371	0.43	0.998	0.888 (0.84 - 0.94)	2.74e-05
rs11984129	7	23119202	KLHL7	A/G	0.371	0.81	0.997	0.888 (0.84 - 0.94)	2.79e-05
rs708382	17	39797870	FAM171A2 LOC390800	T/C	0.392	0.00043	1	1.121 (1.06 - 1.18)	2.81e-05
rs4954687	2	141548809	LRP1B	C/T	0.155	0.35	0.983	1.168 (1.09 - 1.26)	2.82e-05
rs1034963	7	23114998	KLHL7	T/C	0.371	0.2	0.988	0.888 (0.84 - 0.94)	2.82e-05
rs1357966	2	141550091	LRP1B	A/G	0.116	0.63	0.999	1.187 (1.10 - 1.29)	2.82e-05
rs11564252	12	39100000	MUC19	T/C	0.179	1	0.997	1.155 (1.08 - 1.24)	2.83e-05
rs4859148	3	184168134	DCUN1D1	A/G	0.347	0.076	1	0.886 (0.84 - 0.94)	2.85e-05
rs6755234	2	141526207	LRP1B	A/C	0.092	0.29	1	1.207 (1.11 - 1.32)	2.86e-05
rs7018431	8	270645	ZNF596 FAM87A	A/G	0.087	0.73	1	1.213 (1.11 - 1.33)	2.89e-05
rs2869851	4	77313855	SCARB2	T/G	0.212	0.37	0.999	1.144 (1.07 - 1.22)	2.94e-05
rs138054	22	42550905	HMGN2P9 SULT4A1	G/A	0.207	0.067	0.993	1.147 (1.08 - 1.22)	2.95e-05
rs850737	17	39799310	LOC390800 ITGA2B	T/C	0.392	0.00035	1	1.120 (1.06 - 1.18)	3.01e-05
rs12132270	1	203927563	SLC45A3 NUCKS1	C/T	0.141	0.36	0.999	1.173 (1.09 - 1.26)	3.03e-05
rs12816667	12	39755161	CNTN1 PDZRN4	A/G	0.061	0.15	1	1.249 (1.12 - 1.39)	3.05e-05
rs4792827	17	41487141	MAPT	C/T	0.463	0.85	1	1.120 (1.06 - 1.18)	3.13e-05
rs8096948	18	38935291	RIT2	T/C	0.229	0.11	1	1.140 (1.07 - 1.21)	3.13e-05
rs2435200	17	41427688	MAPT	G/A	0.411	0.058	1	0.890 (0.84 - 0.94)	3.14e-05
rs2801943	10	42267633	CCNYL2	T/C	0.441	0.35	0.997	0.892 (0.85 - 0.94)	3.17e-05
rs764533	7	23120400	KLHL7	C/T	0.37	0.49	1	0.889 (0.84 - 0.94)	3.2e-05
rs2955359	17	17887455	C17orf39	C/T	0.334	0.75	1	0.885 (0.84 - 0.94)	3.21e-05
rs943914	14	54509818	WDHD1	C/A	0.297	0.93	0.997	0.882 (0.83 - 0.94)	3.37e-05
rs1558313	7	23122604	KLHL7	G/A	0.37	0.42	1	0.889 (0.84 - 0.94)	3.37e-05
rs6140909	20	9207371	PLCB4	G/A	0.04	0.52	1	1.304 (1.15 - 1.48)	3.43e-05
rs16860458	2	173040203	ITGA6	A/G	0.008	0.51	1	1.683 (1.31 - 2.16)	3.44e-05
rs17763599	19	2320415	SPPL2B TMPRSS9	G/T	0.279	0.95	1	1.131 (1.07 - 1.20)	3.5e-05
rs873785	4	915149	GAK	T/C	0.368	0.1	1	0.888 (0.84 - 0.94)	3.53e-05
rs11727049	4	129287629	LARP1B	G/T	0.347	0.43	1	0.887 (0.84 - 0.94)	3.66e-05
rs17026370	3	3100441	IL5RA	G/T	0.026	0.59	0.993	1.375 (1.18 - 1.60)	3.67e-05
rs13046236	21	40904499	DSCAM	G/A	0.23	0.45	1	0.873 (0.82 - 0.93)	3.68e-05
rs2583981	4	90971605	SNCA	A/T	0.267	0.00016	0.951	1.131 (1.07 - 1.20)	3.72e-05
rs12464032	2	125014078	CNTNAP5	G/A	0.363	0.51	1	0.889 (0.84 - 0.94)	3.79e-05
rs1504009	2	125019750	CNTNAP5	T/C	0.363	0.43	1	0.889 (0.84 - 0.94)	3.83e-05
rs2074546	19	2303639	SPPL2B	G/A	0.266	0.46	0.999	1.132 (1.07 - 1.20)	3.87e-05
rs8116325	20	40345620	PTPRT	C/A	0.352	0.62	1	0.888 (0.84 - 0.94)	3.9e-05
rs1867153	15	73058282	RPP25 SCAMP5	C/T	0.315	0.41	1	0.885 (0.84 - 0.94)	3.91e-05
rs17689966	17	41266236	MAPT	A/G	0.437	0.45	0.999	0.893 (0.85 - 0.94)	3.91e-05
rs10819174	9	128307886	FAM125B	C/T	0.287	0.45	1	0.882 (0.83 - 0.94)	3.95e-05
rs331610	20	55056266	PTMAP6 BMP7	A/G	0.31	0.86	0.985	1.127 (1.06 - 1.19)	4.02e-05
rs9948128	18	5882517	TMEM200C L3MBTL4	T/C	0.45	0.36	1	0.894 (0.85 - 0.94)	4.03e-05
rs7424288	2	230726413	SLC16A14 SP110	T/C	0.232	0.006	0.999	1.137 (1.07 - 1.21)	4.05e-05
rs12470517	2	125016131	CNTNAP5	T/C	0.363	0.45	1	0.890 (0.84 - 0.94)	4.07e-05
rs4925125	17	17735169	TOM1L2	C/T	0.394	0.69	0.997	0.891 (0.84 - 0.94)	4.12e-05
rs3814127	9	128305563	FAM125B	A/G	0.293	0.11	0.997	0.883 (0.83 - 0.94)	4.14e-05
rs8054636	16	19153637	SYT17	C/T	0.45	0.95	1	1.118 (1.06 - 1.18)	4.21e-05
rs1265093	6	31215166	PSORS1C2 PSORS1C1	G/A	0.256	0.18	1	0.877 (0.82 - 0.93)	4.22e-05
rs4076437	3	130518659	H1FX C3orf47	T/C	0.117	0.051	0.995	1.180 (1.09 - 1.28)	4.22e-05
rs11343	16	19186965	SYT17 LOC728276	G/T	0.451	0.46	1	1.117 (1.06 - 1.18)	4.29e-05
rs2553427	3	102589217	SENP7	A/G	0.376	0.3	1	1.120 (1.06 - 1.18)	4.35e-05
i4000434	13	19661691	GJB2	I/D	0.009	1	0.968	1.683 (1.31 - 2.17)	4.47e-05
rs2955355	17	17889200	C17orf39	A/G	0.335	0.64	1	0.887 (0.84 - 0.94)	4.49e-05
rs2290403	4	932006	TMEM175	G/A	0.361	0.7	0.966	0.892 (0.84 - 0.94)	4.58e-05
rs2968538	7	71476143	RPS28P6 CALN1	G/A	0.441	0.55	0.994	0.894 (0.85 - 0.94)	4.58e-05
rs3739567	9	128305962	FAM125B	T/C	0.293	0.26	1	0.884 (0.83 - 0.94)	4.6e-05
rs17615676	7	12684674	SCIN ARL4A	T/C	0.223	0.33	1	0.872 (0.82 - 0.93)	4.73e-05
rs10038927	5	64685272	ADAMTS6	A/G	0.333	0.84	0.999	1.123 (1.06 - 1.19)	4.8e-05
rs2114567	12	39111754	MUC19	G/A	0.187	0.13	0.965	1.151 (1.08 - 1.23)	4.82e-05
rs10756881	9	17453615	CNTLN	C/T	0.112	0.89	0.999	1.182 (1.09 - 1.28)	4.89e-05
rs580116	3	184355140	LAMP3	C/T	0.17	0.95	1	0.859 (0.80 - 0.92)	4.91e-05
rs1400637	2	168844735	PHF5GP LASS6	C/A	0.265	0.45	0.997	1.131 (1.07 - 1.20)	4.92e-05
rs17126237	8	18025369	LOC100133073 NAT1	C/T	0.115	0.64	0.998	0.834 (0.76 - 0.91)	4.92e-05
rs3873380	6	31370417	HLA-C HLA-B	C/T	0.31	0.85	0.998	0.886 (0.84 - 0.94)	4.97e-05
rs9897702	17	37862931	PTRF ATP6V0A1	G/A	0.27	0.6	0.999	1.130 (1.06 - 1.20)	5e-05
rs3134768	6	31314823	HCG27 HLA-C	G/C	0.251	0.034	0.977	1.134 (1.07 - 1.21)	5.04e-05
rs2242838	21	15822288	CYCSP42 USP25	G/A	0.354	0.73	1	1.121 (1.06 - 1.18)	5.08e-05
rs10074991	5	40826308	PRKAA1	G/A	0.282	0.3	0.992	1.129 (1.06 - 1.20)	5.11e-05
rs6502629	17	17810367	TOM1L2	A/G	0.441	0.28	1	0.894 (0.85 - 0.94)	5.11e-05
rs11178961	12	39581806	CNTN1	C/T	0.093	0.43	1	1.200 (1.10 - 1.31)	5.14e-05
rs909626	6	15625663	JARID2	C/T	0.156	0.52	0.99	0.854 (0.79 - 0.92)	5.19e-05
rs7294619	12	38903469	SLC2A13 LRRK2	T/C	0.116	0.74	0.97	1.179 (1.09 - 1.28)	5.19e-05
rs1430961	4	90771943	GPRIN3 SNCA	A/G	0.085	0.55	1	1.205 (1.10 - 1.32)	5.24e-05
rs11675641	2	75831043	C2orf3 SUCLA2P2	A/C	0.086	0.86	1	0.813 (0.74 - 0.90)	5.27e-05
rs1920650	3	161818282	RPL6P8 ARL14	T/C	0.296	0.3	1	0.885 (0.83 - 0.94)	5.27e-05
rs732999	16	19176338	SYT17	T/C	0.389	0.35	1	1.117 (1.06 - 1.18)	5.31e-05
rs13099939	3	184192924	DCUN1D1 MCCC1	A/C	0.332	0.066	0.998	0.888 (0.84 - 0.94)	5.39e-05
rs2619363	4	90978070	SNCA	G/T	0.268	0.42	0.968	1.128 (1.06 - 1.20)	5.41e-05
rs902910	4	189257342	TRIML2	G/A	0.087	0.95	1	1.202 (1.10 - 1.32)	5.45e-05
rs12502363	4	90932087	SNCA	G/A	0.383	0.62	1	0.892 (0.84 - 0.94)	5.47e-05
rs2307121	5	64661268	ADAMTS6	C/T	0.332	0.98	0.999	1.122 (1.06 - 1.19)	5.48e-05
rs764534	7	23120460	KLHL7	C/T	0.366	0.54	1	0.892 (0.84 - 0.94)	5.49e-05
rs17529642	2	200405775	LOC348751	T/C	0.127	0.8	0.999	1.173 (1.09 - 1.27)	5.55e-05
rs6441608	3	102663718	BTF3P16 SENP7	A/G	0.376	0.36	1	1.118 (1.06 - 1.18)	5.58e-05
rs3812945	15	73076775	SCAMP5	T/C	0.45	0.18	1	1.116 (1.06 - 1.18)	5.64e-05
rs35881	3	29574667	LOC100129900 RBMS3	C/T	0.431	0.2	0.998	0.896 (0.85 - 0.95)	5.73e-05
rs10239760	7	23116475	KLHL7	C/T	0.366	0.6	1	0.892 (0.84 - 0.94)	5.73e-05
rs242944	17	41278960	MAPT	A/G	0.436	0.4	0.999	0.896 (0.85 - 0.95)	5.75e-05
rs755690	19	43859200	ACTN4	G/A	0.447	0.071	0.999	0.896 (0.85 - 0.95)	5.82e-05
rs624032	10	28998382	WAC BAMBI	C/T	0.351	0.29	1	0.891 (0.84 - 0.94)	6.01e-05
rs6124439	20	40353349	PTPRT	G/A	0.284	0.45	1	0.884 (0.83 - 0.94)	6.05e-05
rs12316203	12	39569938	CNTN1	C/T	0.092	0.31	1	1.199 (1.10 - 1.31)	6.06e-05
rs6532197	4	91016324	LOC644248 MMRN1	A/G	0.076	0.31	1	1.213 (1.10 - 1.33)	6.13e-05
rs716409	13	52340712	PCDH8 OLFM4	C/A	0.055	0.011	0.998	1.249 (1.12 - 1.39)	6.23e-05
rs9870114	3	102452930	IMPG2	T/C	0.468	0.38	1	1.115 (1.06 - 1.18)	6.26e-05
rs12569630	10	121352650	TIAL1 LOC100128880	G/A	0.419	0.68	1	0.895 (0.85 - 0.95)	6.36e-05
rs11932021	4	90784241	GPRIN3 SNCA	C/T	0.083	0.49	1	1.204 (1.10 - 1.32)	6.43e-05
rs4793039	17	38013760	FAM134C	A/G	0.269	0.73	1	1.128 (1.06 - 1.20)	6.46e-05
rs6497337	16	19151925	SYT17	G/A	0.345	0.65	1	1.119 (1.06 - 1.18)	6.48e-05
rs11780980	8	11320303	FAM167A C8orf12	C/T	0.206	0.52	0.999	0.871 (0.81 - 0.93)	6.53e-05
rs3816145	10	121337319	TIAL1	T/C	0.231	0.39	1	0.876 (0.82 - 0.93)	6.56e-05
rs10519131	15	59788424	VPS13C	A/C	0.121	0.031	1	0.840 (0.77 - 0.92)	6.65e-05
rs11145739	9	79997688	ASS1P3 CEP78	G/A	0.002	1	1	2.666 (1.62 - 4.39)	6.7e-05
rs927839	20	55077559	PTMAP6 BMP7	T/C	0.274	0.4	1	1.126 (1.06 - 1.19)	6.73e-05
rs1945004	18	38808891	RIT2	C/T	0.188	0.23	1	1.145 (1.07 - 1.22)	6.76e-05
rs12493050	3	184347767	LAMP3	A/G	0.208	0.66	1	0.872 (0.82 - 0.93)	6.78e-05
rs2279186	4	865887	GAK	G/A	0.261	0.22	0.999	0.882 (0.83 - 0.94)	6.87e-05
rs10878386	12	39012195	LRRK2	A/G	0.075	0.45	1	0.804 (0.72 - 0.90)	6.95e-05
rs2270822	5	60494797	C5orf43 ZSWIM6	C/T	0.108	0.95	1	1.182 (1.09 - 1.28)	6.98e-05
rs7133914	12	38989178	LRRK2	G/A	0.071	0.77	1	0.800 (0.72 - 0.89)	7.03e-05
rs7402147	15	24992741	FAM18B3P GABRG3	G/A	0.494	0.049	0.999	0.898 (0.85 - 0.95)	7.04e-05
rs10934878	3	130495434	C3orf37	A/G	0.12	0.027	1	1.173 (1.08 - 1.27)	7.08e-05
rs955187	7	23161130	KLHL7	G/A	0.398	0.7	1	0.895 (0.85 - 0.95)	7.1e-05
rs2242656	6	31722081	BAG6	T/C	0.203	0.45	0.999	1.139 (1.07 - 1.21)	7.12e-05
rs2395157	6	32456123	HNRNPA1P2 BTNL2	A/G	0.279	0.25	0.997	0.885 (0.83 - 0.94)	7.12e-05
rs1266071	6	31777475	ABHD16A	C/T	0.101	0.031	0.994	0.830 (0.76 - 0.91)	7.18e-05
rs1901632	10	4803211	LOC338588 AKR1E2	C/A	0.301	0.12	0.999	0.888 (0.84 - 0.94)	7.2e-05
rs7320516	13	38541400	NHLRC3 LHFP	G/A	0.211	0.083	0.999	1.138 (1.07 - 1.21)	7.27e-05
rs6576808	1	86411336	COL24A1 ODF2L	A/G	0.105	0.32	1	0.829 (0.76 - 0.91)	7.33e-05
rs708384	17	39793208	FAM171A2	C/A	0.364	0.00019	1	1.115 (1.06 - 1.18)	7.41e-05
rs12210027	6	119229448	PLN ASF1A	T/C	0.042	0.22	1	0.753 (0.65 - 0.87)	7.45e-05
rs754593	17	41410532	MAPT	A/G	0.408	0.16	1	0.896 (0.85 - 0.95)	7.47e-05
rs7147286	14	54428415	FDPSP3 GCH1	G/A	0.319	0.35	0.985	0.889 (0.84 - 0.94)	7.55e-05
rs3755963	4	884255	GAK	A/G	0.294	0.28	1	0.887 (0.84 - 0.94)	7.57e-05
rs6905949	6	30248504	TRIM15 TRIM26	T/C	0.189	5.6e-05	1	1.144 (1.07 - 1.22)	7.58e-05
rs1444011	23	14989666	LOC100128521 RPL35AP37	A/G	0.467	1	1	1.089 (1.04 - 1.14)	7.64e-05
rs7027354	9	22615342	DMRTA1 LOC646609	A/G	0.182	0.048	1	0.866 (0.81 - 0.93)	7.68e-05
rs460699	21	40886565	DSCAM	T/C	0.361	0.21	0.999	0.894 (0.85 - 0.94)	7.7e-05
rs12951376	17	17693534	TOM1L2	C/T	0.317	0.54	0.998	0.889 (0.84 - 0.94)	7.75e-05
rs854787	17	17975744	MYO15A	A/G	0.429	0.22	0.998	0.896 (0.85 - 0.95)	7.75e-05
rs999361	4	77336598	SCARB2	A/C	0.209	0.29	1	1.137 (1.07 - 1.21)	7.78e-05
rs854762	17	17949827	DRG2	A/G	0.414	0.93	0.988	0.895 (0.85 - 0.95)	7.98e-05
rs17441835	6	164184574	QKI	G/A	0.072	0.1	1	1.219 (1.10 - 1.34)	8e-05
rs10945926	6	164188594	QKI	G/A	0.073	0.14	0.998	1.219 (1.10 - 1.34)	8.02e-05
rs2076530	6	32471794	BTNL2	T/C	0.429	0.15	1	0.897 (0.85 - 0.95)	8.16e-05
rs9962882	18	38855296	RIT2	T/C	0.181	0.27	0.999	1.145 (1.07 - 1.22)	8.21e-05
rs1406773	3	133227469	CPNE4	A/G	0.067	0.72	1	0.797 (0.71 - 0.89)	8.24e-05
rs452019	10	54999529	MBL2 PCDH15	A/G	0.484	0.93	0.983	1.114 (1.06 - 1.18)	8.27e-05
rs9366778	6	31377152	HLA-C HLA-B	G/A	0.403	0.36	1	0.895 (0.85 - 0.95)	8.43e-05
rs4255064	7	98684620	KPNA7 MYH16	T/C	0.081	0.37	1	0.811 (0.73 - 0.90)	8.44e-05
rs7316418	12	120411986	KDM2B	G/A	0.091	0.2	0.997	1.193 (1.09 - 1.30)	8.46e-05
rs2721819	7	24708653	DFNA5	G/A	0.128	0.13	1	0.847 (0.78 - 0.92)	8.47e-05
rs1542096	4	77423524	FAM47E	T/C	0.333	0.46	1	0.891 (0.84 - 0.94)	8.52e-05
rs9458896	6	164084223	QKI	T/C	0.43	0.2	1	0.897 (0.85 - 0.95)	8.58e-05
rs3132453	6	31712023	SNORA38 PRRC2A	G/T	0.065	0.12	1	1.226 (1.11 - 1.36)	8.76e-05
rs16905838	8	137493649	KHDRBS3	C/T	0.008	0.27	1	0.438 (0.29 - 0.67)	8.81e-05
rs1907633	12	38936618	LRRK2	C/T	0.148	0.79	0.97	1.155 (1.07 - 1.24)	8.86e-05
rs823066	1	204037796	SLC41A1	G/A	0.065	0.0015	1	0.794 (0.71 - 0.89)	8.9e-05
rs17632029	10	14008131	FRMD4A	C/T	0.145	0.45	0.999	0.855 (0.79 - 0.92)	8.92e-05
rs10757998	9	31014144	FTLP4 LOC138412	A/G	0.1	0.85	1	0.828 (0.75 - 0.91)	8.92e-05
rs6873137	5	156366831	TIMD4 HAVCR1	C/T	0.42	0.44	1	0.897 (0.85 - 0.95)	9.01e-05
rs2505838	10	42147957	PABPC1P8 LOC441666	G/A	0.403	0.18	1	1.113 (1.06 - 1.17)	9.1e-05
rs8054408	16	19154025	SYT17	A/G	0.365	0.93	1	1.115 (1.06 - 1.18)	9.12e-05
rs2306054	4	129231631	LARP1B	A/G	0.335	0.72	0.999	0.892 (0.84 - 0.94)	9.12e-05
rs979316	20	55089729	PTMAP6 BMP7	C/T	0.258	0.48	0.998	1.126 (1.06 - 1.19)	9.14e-05
rs8078967	17	41363929	MAPT	C/T	0.443	0.4	1	1.111 (1.05 - 1.17)	9.16e-05
rs11564205	12	39000276	LRRK2	A/G	0.149	0.86	0.969	1.154 (1.07 - 1.24)	9.23e-05
rs6464536	7	142399594	KEL OR9A2	C/T	0.082	0.44	1	1.203 (1.10 - 1.32)	9.27e-05
rs10928374	2	148568505	ORC4 LOC100130682	A/G	0.438	0.4	0.999	0.897 (0.85 - 0.95)	9.31e-05
rs1907632	12	38936769	LRRK2	G/A	0.148	0.47	1	1.155 (1.07 - 1.24)	9.33e-05
rs10211158	2	127057824	YWHAZP2 GYPC	T/C	0.116	0.059	0.999	0.842 (0.77 - 0.92)	9.4e-05
rs12509092	4	129263259	LARP1B	A/G	0.335	0.68	1	0.892 (0.84 - 0.94)	9.44e-05
rs173365	17	41256855	MAPT	G/A	0.438	0.4	1	0.899 (0.85 - 0.95)	9.46e-05
rs11853885	15	59781906	VPS13C	G/A	0.118	0.035	1	0.842 (0.77 - 0.92)	9.47e-05
rs1234413	2	148560839	ORC4 LOC100130682	C/T	0.438	0.39	1	0.897 (0.85 - 0.95)	9.5e-05
rs7407708	18	38819903	RIT2	A/G	0.203	0.16	1	1.138 (1.07 - 1.21)	9.51e-05
rs12645577	4	129320093	LARP1B	A/G	0.336	0.67	1	0.893 (0.84 - 0.95)	9.61e-05
rs11174631	12	38671385	SLC2A13	C/T	0.037	0.54	0.999	1.297 (1.14 - 1.48)	9.64e-05
rs8065563	17	17723129	TOM1L2	A/G	0.398	0.9	1	0.896 (0.85 - 0.95)	9.68e-05
rs331603	20	55052353	PTMAP6 BMP7	A/G	0.314	0.53	0.999	1.119 (1.06 - 1.18)	9.75e-05
rs12996731	2	141573560	LRP1B	A/G	0.48	0.29	1	1.112 (1.05 - 1.17)	9.84e-05
rs4973275	2	230722749	SLC16A14 SP110	T/C	0.225	0.0016	1	1.131 (1.06 - 1.20)	9.84e-05
rs7297212	12	5433770	NTF3	G/A	0.108	0.69	1	0.837 (0.77 - 0.92)	9.89e-05
rs4072739	17	17825385	LRRC48	G/A	0.326	0.29	1	0.892 (0.84 - 0.94)	9.96e-05
