# Supplementary material for: Web-Based Genome-Wide Association Study Identifies Two Novel Loci and a Substantial Genetic Component for Parkinson's Disease
Source: PLoS Genet. 2011 Jun 23;7(6):e1002141. doi: 10.1371/journal.pgen.1002141 (PMC3121750; doi:10.1371/journal.pgen.1002141)
Supplement: Table S5 — Bias-corrected model. This model, which achieves a covariate-adjusted AUC of 0.608 on the NINDS data, was obtained by training on the 23andMe cohort, using the subset of SNPs that were shared with the NINDS cohort. refers to the weight for each SNP (i.e., the log odds ratio per copy of the alphabetically lesser allele), and is the weight used in the algorithm in the case of missing data for that SNP. (PDF) [file pgen.1002141.s009.pdf]

# Web-based genome-wide association study identifies two novel loci and a substantial genetic component for Parkinson's disease

Do, Tung, Dorfman, Kiefer, Drabant, Francke, Mountain, Goldman, Tanner, Langston, Wojcicki, Eriksson

| rsid       | chrom | bp        | $w_i$    | $w_i^{missing}$ |
|------------|-------|-----------|----------|-----------------|
| bias       | -     | -         | -1.93614 | -               |
| rs823156   | 1     | 204031263 | 0.17978  | 0.29361         |
| rs2117511  | 2     | 136179131 | -0.19903 | -0.04755        |
| rs10513789 | 3     | 184242767 | -0.20692 | -0.08325        |
| rs6599389  | 4     | 929113    | 0.22544  | 0.03374         |
| rs11248060 | 4     | 954359    | -0.18680 | -0.32637        |
| rs11724804 | 4     | 955779    | -0.07805 | -0.06768        |
| rs4395500  | 4     | 13433745  | -0.15007 | -0.23841        |
| rs6812193  | 4     | 77418010  | 0.17122  | 0.21732         |
| rs11931074 | 4     | 90858538  | -0.14634 | -0.26935        |
| rs356220   | 4     | 90860363  | -0.11414 | -0.14267        |
| rs2736990  | 4     | 90897564  | -0.13371 | -0.14259        |
| rs9366778  | 6     | 31377152  | -0.12434 | -0.10019        |
| rs10886515 | 10    | 121333579 | -0.15044 | -0.08701        |
| rs6589497  | 11    | 115128203 | 0.18249  | 0.04090         |
| rs10878246 | 12    | 38918366  | 0.15039  | 0.05717         |
| rs11868035 | 17    | 17655826  | -0.15247 | -0.09411        |
| rs708382   | 17    | 39797870  | 0.12370  | 0.09699         |
| rs12185268 | 17    | 41279463  | 0.17776  | 0.28040         |
| rs12373139 | 17    | 41279910  | -0.06829 | -0.02925        |
| rs11878694 | 19    | 6947509   | 0.20529  | 0.36115         |
| rs1276377  | 20    | 55031299  | -0.08092 | -0.10845        |
| rs331617   | 20    | 55073255  | 0.09799  | 0.05514         |

**Table S5. Bias-corrected  $E[FP] \leq 1$  model.** This model, which achieves a covariate-adjusted AUC of 0.608 on the NINDS data, was obtained by training on the 23andMe cohort, using the subset of SNPs that were shared with the NINDS cohort.  $w_i$  refers to the weight for each SNP (i.e., the log odds ratio per copy of the alphabetically lesser allele), and  $w_i^{missing}$  is the weight used in the algorithm in the case of missing data for that SNP.
