# Supplementary material for: Web-Based Genome-Wide Association Study Identifies Two Novel Loci and a Substantial Genetic Component for Parkinson's Disease
Source: PLoS Genet. 2011 Jun 23;7(6):e1002141. doi: 10.1371/journal.pgen.1002141 (PMC3121750; doi:10.1371/journal.pgen.1002141)
Supplement: Table S8 — Exclusionary conditions. People reporting any of the above diagnoses were excluded from the analysis. (PDF) [file pgen.1002141.s012.pdf]

# Web-based genome-wide association study identifies two novel loci and a substantial genetic component for Parkinson's disease

Do, Tung, Dorfman, Kiefer, Drabant, Francke, Mountain, Goldman, Tanner, Langston, Wojcicki, Eriksson

---

---

|                                                                                        |
|----------------------------------------------------------------------------------------|
| Progressive supranuclear palsy                                                         |
| Multiple system atrophy (or Shy-Drager syndrome or striatonigral degeneration)         |
| Spinal cerebellar ataxia (or cerebellar degeneration or olivopontocerebellar atrophy)  |
| Cortical basal ganglionic degeneration                                                 |
| Parkinsonism due to medications (or drug-induced parkinsonism)                         |
| Frontotemporal dementia with parkinsonism                                              |
| Frontotemporal dementia                                                                |
| Picks disease                                                                          |
| Dystonic tremor                                                                        |
| Rubral tremor                                                                          |
| Primary writing tremor                                                                 |
| Cerebellar tremor                                                                      |
| Multiple sclerosis                                                                     |
| Motor neuron disease (or amyotrophic lateral sclerosis or Lou Gehrig's disease)        |
| Spinal muscular atrophy (or progressive muscular atrophy or primary lateral sclerosis) |
| Epilepsy (or seizure disorder)                                                         |
| Myoclonus                                                                              |
| Dystonia                                                                               |
| Tourette syndrome (or tic disorder)                                                    |

---

---

**Table S8. Exclusionary conditions.** People reporting any of the above diagnoses were excluded from the analysis.
